# Supplementary material
Source: PubMed Central journal article supplement (PMC3635105)

**A**

|        |   |                            |         |                          |                          |        |
|--------|---|----------------------------|---------|--------------------------|--------------------------|--------|
| Human  | 1 | MGKVKVGVNGFGRIGRLVTRAAFN   | SGKVDI  | VAINDPFIDLNYMVMFYDSTHGK  | FHGTV                    | 60     |
| Mouse  |   | M- -VKVGVNGFGRIGRLVTRAAI   | CSGKVEI | VAINDPFIDLNYMVMFYDSTHGK  | FNGTV                    | 58     |
| Rabbit |   | M- -VKVGVNGFGRIGRLVTRAAFN  | SGKVDV  | VAINDPFIDLHYMVMFYDSTHGK  | FHGTV                    |        |
| Rat    |   | M- -VKVGVNGFGRIGRLVTRAAFS  | CDKVDI  | VAINDPFIDLNYMVMFYDSTHGK  | FNGTV                    |        |
|        |   | *****                      | *****   | *****                    | *****                    | *****  |
| Human  |   | KAENGLVINGNPITIFQERDPSKIK  | WGDA    | GAEYVVESTGVFTTMEKAGAHL   | QGGAKRVI                 | 120    |
| Mouse  |   | KAENGLVINGKPIITIFQERDPTNIK | WGEA    | GAEYVVESTGVFTTMEKAGAHL   | KGGAKRVI                 | 118    |
| Rabbit |   | KAENGLVINGKAITIFQERDPANIK  | WGDA    | GAEYVVESTGVFTTMEKAGAHL   | KGGAKRVI                 |        |
| Rat    |   | KAENGLVINGKPIITIFQERDPANIK | WGDA    | GAEYVVESTGVFTTMEKAGAHL   | KGGAKRVI                 |        |
|        |   | *****                      | *****   | *****                    | *****                    | *****  |
| Human  |   | ISAPSADAPMFVMGVNHEKYDNSL   | KIISNA  | ▽                        | SCTTNCLAPLAKVIHDNFGIVEGL | MTTVHA |
| Mouse  |   | ISAPSADAPMFVMGVNHEKYDNSL   | KIVSNA  | SCTTNCLAPLAKVIHDNFGIVEGL | MTTVHA                   | 178    |
| Rabbit |   | ISAPSDAPMFVMGVNHEKYDNSL    | KIVSNA  | SCTTNCLAPLAKVIHDNFGIVEGL | MTTVHA                   |        |
| Rat    |   | ISAPSADAPMFVMGVNHEKYDNSL   | KIVSNA  | SCTTNCLAPLAKVIHDNFGIVEGL | MTTVHA                   |        |
|        |   | *****                      | *****   | *****                    | *****                    | *****  |
| Human  |   | ITATQKTVDGSPGSKLWRDGRGAL   | QNIIPAS | TGAAKAVGKVIPELNGKLTGMA   | FRVPTANV                 | 240    |
| Mouse  |   | ITATQKTVDGSPGSKLWRDGRGAA   | QNIIPAS | TGAAKAVGKVIPELNGKLTGMA   | FRVPTPNV                 | 238    |
| Rabbit |   | ITATQKTVDGSPGSKLWRDGRGAA   | QNIIPAS | TGAAKAVGKVIPELNGKLTGMA   | FRVPTPNV                 |        |
| Rat    |   | ITATQKTVDGSPGSKLWRDGRGAA   | QNIIPAS | TGAAKAVGKVIPELNGKLTGMA   | FRVPTPNV                 |        |
|        |   | *****                      | *****   | *****                    | *****                    | *****  |
| Human  |   | SVVDLTCRLEKPAKYDDIKKVVVK   | QASEGPL | KGILGYTEHQVVSDFNSDTHS    | STFDAGAG                 | 300    |
| Mouse  |   | SVVDLTCRLEKPAKYDDIKKVVVK   | QASEGPL | KGILGYTEDQVVSDFNSNSHS    | STFDAGAG                 | 298    |
| Rabbit |   | SVVDLTCRLEKAAKYDDIKKVVVK   | QASEGPL | KGILGYTEDQVVSDFNSATHS    | STFDAGAG                 |        |
| Rat    |   | SVVDLTCRLEKPAKYDDIKKVVVK   | QAAEGPL | KGILGYTEDQVVSDFNSNSHS    | STFDAGAG                 |        |
|        |   | *****                      | *****   | *****                    | *****                    | *****  |
| Human  |   | IALNDHFVKLISWYDNEFGYSNR    | VVLDMAH | MASKE                    |                          | 335    |
| Mouse  |   | IALNDNFVKLISWYDNEYGYSNR    | VVLDMAH | MASKE                    |                          | 333    |
| Rabbit |   | IALNDHFVKLISWYDNEFGYSNR    | VVLDMAH | MASKE                    |                          |        |
| Rat    |   | IALNDNFVKLISWYDNEYGYSNR    | VVLDMAH | MASKE                    |                          |        |
|        |   | *****                      | *****   | *****                    | *****                    | *****  |

**B**

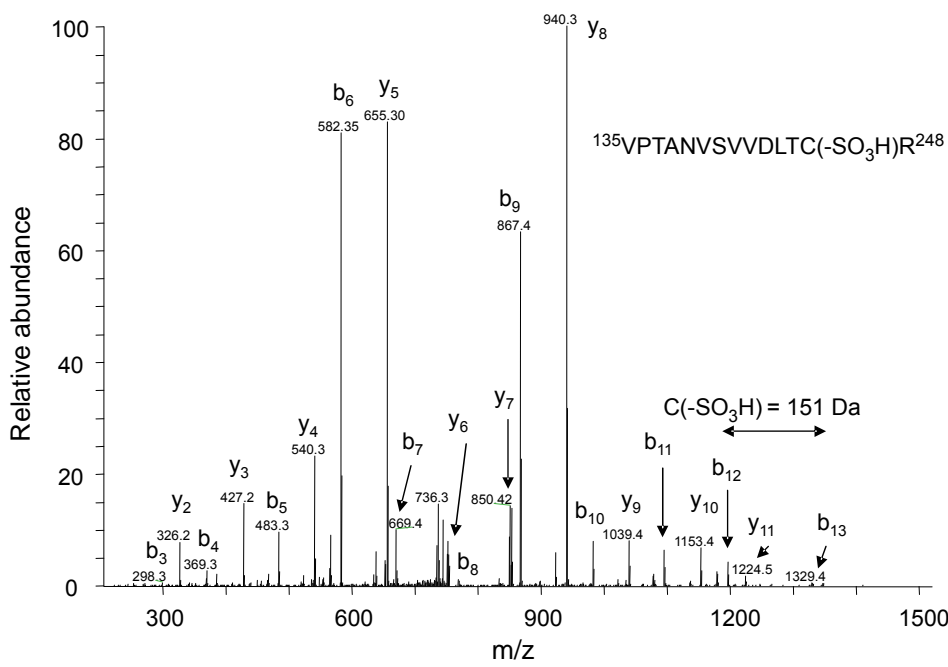

Supplement: NIHMS459682-supplement-01.pdf [file NIHMS459682-supplement-01.pdf]
